## 30 Introduction

31 Organisms use chemicals for a wide variety of forms of communication. In particular, sex  
32 pheromones are species-specific blends of chemical compounds mediating intraspecific  
33 communication between males and females, and can play key roles in both determining the  
34 reproductive success of individuals within a species, and in reproductive isolation between  
35 species (Wyatt, 2003, 2014). Some insects deploy single chemicals as signals, but in many  
36 insects, pheromone communication is dependent on complex combinations of chemical  
37 components (Grillet, Darteville, & Ferveur, 2006; Nieberding *et al.*, 2008; Symonds,  
38 Johnson, & Elgar, 2012). This chemical complexity provides the potential to convey  
39 sophisticated information (Nieberding *et al.*, 2012). The best studied insect sex pheromones  
40 are perhaps the chemicals produced by female moths to attract mating partners, often over  
41 long distances (Löfstedt, 1993; Smadja & Butlin, 2008). Male insects can also produce sex  
42 pheromones but these have generally received less attention (Wyatt, 2014).

43 Whilst variation in sex pheromone blend is now known to be a major determinant of  
44 reproductive isolation and speciation in many species of moths (Löfstedt, 1993; Smadja &  
45 Butlin, 2008; Lassance *et al.*, 2010), to date sex pheromones have been studied in just a few  
46 species of butterfly. Acceptance behaviour in the queen butterfly *Danaus berenice* is  
47 regulated by a dihydropyrrolizine alkaloid released by the male (Brower & Jones, 1965;  
48 Meinwald, Meinwald, & Mazzocchi, 1969; Pliske & Eisner, 1969). Another danaine butterfly,  
49 *Idea leuconoe* displays ‘hair-pencils’ during courtship, which contain a mixture of  
50 dihydropyrrolizine alkaloids, aromatics, terpenoids, hydrocarbons and a series of  $\gamma$ -lactones  
51 (Nishida *et al.*, 1996). This volatile mixture applied on dummy male butterflies elicits an  
52 acceptance posture in females. *Pieris rapae* and *Pieris brassicae* use macrocyclic lactones as  
53 a pheromone to induce acceptance in females (Yildizhan *et al.*, 2009). In *Bicyclus anynana*  
54 males with reduced amounts of male sex pheromone have decreased mating success implying  
55 a direct involvement in reproductive fitness (Nieberding *et al.*, 2008, 2012). Male wing  
56 compounds are also known to contribute to reproductive isolation between closely related  
57 species of butterflies (Gula, McChesney, & Taylor, 1980; Phelan & Baker, 1987; Bacquet *et*  
58 *al.*, 2015).

59 Here we focus on the potential role of a male contributed pheromone in *Heliconius*  
60 butterflies. *Heliconius* is a diverse neotropical genus, studies of which have contributed  
61 greatly to our understanding of speciation (Jiggins, 2008; Merrill *et al.*, 2015). These  
62 butterflies are known for Müllerian mimicry, where unrelated species converge on the same  
63 warning signal to more efficiently advertise their unpalatability to predators. However,  
64 closely related *Heliconius* taxa often differ greatly in colour pattern and divergent selection  
65 acting on warning patterns is believed to play an important role in speciation within the genus

66 (Bates, 1862; Jiggins *et al.*, 2001; Merrill *et al.*, 2011b). In particular, males are known to use  
67 colour pattern to recognize mates (Jiggins *et al.*, 2001; Jiggins, Estrada, & Rodrigues, 2004;  
68 Kronforst *et al.*, 2006; Melo *et al.*, 2009; Merrill *et al.*, 2011a; Merrill, Chia, & Nadeau, 2014;  
69 Finkbeiner, Briscoe, & Reed, 2014).

70         Some aspects of chemical signaling have been studied in *Heliconius*. For example,  
71 males are known to transfer an antiaphrodisiac pheromone to females during mating (Gilbert,  
72 1976). Once mated, females produce a strong odor that acts to repel approaching males  
73 (Schulz *et al.*, 2008). Studies in *H. melpomene* have shown that abdominal glands of males  
74 contain a complex odor bouquet consisting of the volatile compound (*E*)- $\beta$ -ocimene together  
75 with some trace components and esters of common C16 – and C18 – fatty acids with alcohols,  
76 where  $\beta$ -ocimene acts as the main antiaphrodisiac pheromone. This bouquet is formed during  
77 first few days of eclosion and transferred during copulation to the females (Schulz *et al.*,  
78 2008). This antiaphrodisiac effect can be observed in several *Heliconius* species, which show  
79 species-specific patterns of scent gland constituents (Gilbert, 1976). In addition, *Heliconius*  
80 may also use green leaf volatiles during mate searching. Six-carbon alcohols and acetates are  
81 released in larger amounts after tissue damage by caterpillars, which males of the pupal  
82 mating species *H. charithonia* then use to find potential mates (Estrada & Gilbert, 2010).  
83 Once males find pupae they also use chemical cues to determine sex (Estrada *et al.*, 2010).

84         There are also a number of observations that indicate a role for chemical recognition  
85 during adult mating. *H. erato* males can distinguish between wings dissected from conspecific  
86 and heterospecific females that are virtually identical in wing pattern, but this effect  
87 disappears after wings have been washed in hexane (Estrada & Jiggins, 2008). *H. cydno*  
88 males show a preference for their own pattern over that of the closely related *H. melpomene*,  
89 but will court wing pattern models of *H. melpomene*. However, *H. cydno* males have virtually  
90 never been observed mating with *H. melpomene* females, suggesting strong barriers in  
91 addition to wing pattern (Naisbit, Jiggins, & Mallet, 2001). In addition, *H. melpomene*  
92 coexists with visually almost identical co-mimics, notably *H. erato*, which is likely to favour  
93 the evolution of pheromonal recognition signals to avoid confusion in courtship.

94         In some populations the very closely related species *H. timareta*, is sympatric and  
95 mimetic with *H. melpomene*, but nevertheless displays strong assortative mating (Giraldo *et*  
96 *al.*, 2008). A recent study of sympatric *H. melpomene* and *H. timareta* in Peru has provided  
97 some of the first evidence for a role of chemical signals in species recognition (Mérot *et al.*,  
98 2015). Experiments with perfumed males using abdominal scent glands and wing extracts  
99 shows increased probability of inter-specific mating when males were perfumed with  
100 heterospecific extracts. In addition, chemical analysis of both abdominal glands and whole

101 wings provided evidence for differences between these closely related species in their  
102 chemical signatures (Mérot *et al.*, 2015)

103 Here we focus on the wing pheromones of *H. melpomene*. First, we investigate  
104 morphological structures potentially associated with pheromone production. In butterflies, a  
105 variety of species-specific structures including brushes, fans, and differentiated scales on  
106 wings, legs or abdomen are used to expose pheromones produced in associated glands (Wyatt,  
107 2003; Nieberding *et al.*, 2008). In particular, male specific scent glands, termed androconia  
108 are common across the Lepidoptera. In male *Heliconius*, a patch of shiny grey scales is  
109 present on the overlapping region of the hind and forewing (Figure 1). The observed sexual  
110 dimorphism in this trait suggests that these are androconia, and may be associated with a male  
111 sex pheromone (Emsley, 1963). Furthermore, earlier authors have identified brush-like scales  
112 in this region that are the putative site for pheromone production (Müller, 1912; Barth, 1952).  
113 Here we investigate the structure of these scales using Scanning Electron Microscopy.  
114 Second, we complement recently published chemical analysis of whole *H. melpomene* wings  
115 by dissecting wing regions to identify those wing regions that are associated with the  
116 production of compounds and identify potential male sex pheromone compounds isolated  
117 from this region. Finally, using a simple behavioural assay we evaluate female response to  
118 male androconial pheromone extracts.

119

## 120 **Methods**

121 Individuals used for morphological and chemical analyses were from an outbred stock of  
122 *Heliconius melpomene plesseni* and *Heliconius melpomene malleti* (sold as *H. m. aglaope*)  
123 maintained at the University of Cambridge insectaries (Figure 1). These two races are from  
124 the region of a hybrid zone in the eastern Andes of Ecuador, and showed signs of inter-racial  
125 hybridization in the stocks, so are treated here as a single population and referred to as the  
126 Ecuador samples. These stocks were established from individuals obtained from a commercial  
127 breeder (*Stratford Butterfly Farm*: [www.butterflyfarm.co.uk](http://www.butterflyfarm.co.uk)). Laboratory stocks were  
128 maintained on the larval food plants, *Passiflora menispermifolia* and *Passiflora biflora*. Adult  
129 butterflies were fed on ~10% sugar solution mixed with an amino acid supplement (Critical  
130 Care Formula<sup>®</sup>). In addition, five individual males of *H. m. rosina* were sampled from the  
131 wild around the town of Gamboa in Colón Province, Panama, and are referred to as the  
132 Panama samples.

133

### 134 *Morphological analysis*

135 The detailed morphology of androconial scales was determined using Field Emission  
136 Scanning Electron Microscope. Three males and two females of *H. melpomene* from Ecuador

137 were used for this analysis. The androconial grey scale region was dissected out from both  
138 hind and forewings and attached to aluminium stubs with carbon tabs and subsequently  
139 coated with 20nm of gold using a Quorum/Emitech sputter coater. The gold-coated  
140 androconia were then viewed in an FEI XL30 FEGSEM operated at 5kV. Images were  
141 recorded digitally using XL30 software at 500x magnification.

142

#### 143 *Characterization of potential male sex pheromone*

144 Wing tissue from ten male (five newly emerged and five 10-day old mature individuals) and  
145 five female (10-day old) individuals from the Ecuador stock was collected between November  
146 2011 and March 2012 for chemical analysis. In addition, wing tissue from five male adult  
147 individuals from Panama was collected in August 2012 for chemical analysis. Wings were  
148 dissected into four parts: forewing androconia, hindwing androconia, forewing non-  
149 androconia and hindwing non-androconia. The 'androconia' regions corresponded to the  
150 grey-brown region shown in Figure 1c, with non-androconia corresponding to the remaining  
151 portion of the wing. In females, a region corresponding in size and extent to the grey-brown  
152 region seen in males was dissected. The dissected sections were then allowed to soak in either  
153 hexane or dichloromethane for 3 hours in a glass vial. The solvent was then transferred to new  
154 vial and stored at -20°C. Initial tests showed no major differences between hexane and  
155 dichloromethane extracts. Therefore, the more polar dichloromethane was used in later  
156 analysis.

157 Extracts were analyzed by gas chromatography/mass spectrometry (GC/MS) using a  
158 Hewlett-Packard model 5975 mass-selective detector connected to a Hewlett-Packard GC  
159 model 7890A, and equipped with a Hewlett-Packard ALS 7683B autosampler. A HP-5MS  
160 fused silica capillary column (Agilent, 30 m × 0.25 mm, 0.25 µm) was used. Injection was  
161 performed in splitless mode (250°C injector temperature) with helium as the carrier gas  
162 (constant flow of 1.2 ml/min). The temperature programme started at 50°C, was held for 5  
163 min, and then rose to 320°C with a heating rate of 5°C/min. All components were identified  
164 by comparison of mass spectra and gas chromatographic retention index with those of  
165 authentic reference samples, and analysis of mass spectra. The double bond position of  
166 unsaturated compounds were determined by derivatisation with dimethyl disulfide (Buser *et*  
167 *al.*, 1983). The alcohols were synthesised from the corresponding esters by reduction  
168 according to established procedures (Becker & Beckert, 1993, p. 570). The aldehydes were  
169 synthesised by oxidation of the respective alcohols (More & Finney, 2002). Synthesis of the  
170 methyl branched alcohols and aldehydes will be reported elsewhere (F. Mann *et al.*, in  
171 preparation). The samples were quantified by using gas chromatography with flame ionisation  
172 detection with a Hewlett-Packard GC model 7890A equipped with a Hewlett-Packard ALS

173 7683B autosampler. A BPX-5 fused silica capillary column (SGE, 25 m × 0.22 mm, 0.25 μm)  
174 was used. Injection was performed in splitless mode (250°C injector temperature) with  
175 hydrogen as the carrier gas (constant flow of 1.65 ml/min). The temperature programme  
176 started at 50°C, held for 5 min, and then rose to 320°C with a heating rate of 5°C/min.  
177 Pentadecyl acetate (10.1 ng) or (*Z*)-4-tridecenyl acetate (1 ng) were used as internal standard.  
178 Only compounds eluting earlier than hexacosane were considered for analysis. Later  
179 compounds were identified as cuticular hydrocarbons, 2,5-dialkyltetrahydrofurans, cholesterol  
180 and artefacts like phthalates or adipates. The variability in the late eluting cuticular  
181 hydrocarbons was low and did not show characteristic differences.

182

### 183 *Behavioural experiments*

184 Behavioural assays to determine female response to the putative male sex pheromone were  
185 conducted in the *Heliconius* insectaries at the Smithsonian Tropical Research Institute's  
186 (STRI) in Gamboa, Panama between January 2013 and July 2013. Females were assayed  
187 from an outbred stock of *H. melpomene rosina* established from wild individuals collected in  
188 Gamboa (9°7.4' N, 79°42.2' W, elevation 60 m) and the nearby Soberanía National Park,  
189 República de Panamá. Stocks were maintained on the larval food plants, *Passiflora*  
190 *menispermifolia* and *Passiflora biflora*. Adult butterflies were fed on ~20% sugar solution  
191 with pollen supplements and *Psychotria sp.* and *Psiguria sp.* serving as an additional pollen  
192 source. Males sacrificed for extracts for behavioural experiments were either from this same  
193 stock or were wild individuals collected in Gamboa or the Soberanía National Park. Male  
194 extracts were obtained by dissecting the androconial region from both hindwings, followed by  
195 soaking in 200 μl of hexane for 2-3 hours before transferring the solvent to a new glass vial.  
196 This vial was sealed and stored at -20°C until required.

197 Behavioural experiments were performed in cages approximately 2m x 2m x 2m.  
198 Ten virgin females (<5 days after eclosion) were presented with a paper model of *H.*  
199 *melpomene rosina* attached to a ~30cm length of wire, itself attached to a ~60cm stick on  
200 which a camera (Xdreme HD 1080P Action camera) was mounted to record female  
201 behaviour. Pheromone extracts from individual *H. melpomene* males or a control (solvent  
202 only) were applied to a strip of Whatman filter paper no. 4, which was attached to the paper  
203 butterfly model. The extract of a single male was used for each individual female, so in total  
204 ten virgin females and ten male extracts were used. Each trial proceeded as follows: After  
205 mounting the paper model on the wire, 200 μl of extract/control was applied to the filter  
206 paper. Trials were conducted blind: A third party applied the extract/control so that the  
207 experimenter did not know whether they were presenting the focal female with the extract or  
208 control. The paper model was then presented to the focal female, and the apparatus



209 manipulated to simulate the hovering flight observed in courting males. Each presentation  
210 lasted one minute, followed by a one-minute break when the model was removed from the  
211 vicinity of the focal female. This was repeated five times before a further five-minute pause in  
212 the trial. The whole procedure was repeated six times, alternating between the two treatments,  
213 so that each female experienced a total of 15 presentations with the male extract and 15  
214 presentations with the control (solvent only).

215 Female behaviours were scored from videos recorded during the trials. To avoid  
216 observer bias, the names and order of the digital video files were randomized and only  
217 reassigned to treatment and individual once scoring was complete. We determined the  
218 behaviours to be recorded from observations of interactions between *H. melpomene* males and  
219 females (Table 1). These were ‘Slow and moderate wing flapping’, where females opened and  
220 closed their wings slowly at regular intervals displaying their wing colors; ‘Flying/Flying  
221 facing towards model’ where females tried to chase the paper models for short intervals or  
222 females hovered facing the model; ‘Slow rhythmic flight’ where females displayed slow flight  
223 with intermittent gliding; ‘Wing display with abdomen normal’ where females opened their  
224 wings displaying the dorsal wing surface with the abdomen between the wings; ‘Quick and  
225 jerky wing flapping’ where there was continuous wing fluttering by females that effectively  
226 prevented close contact by the model; ‘Flying away from model’ where females flew away  
227 from the paper model avoiding any interaction; ‘Fast erratic flight’ where such flight was  
228 notably very fast, abrupt and apparently directionless and finally ‘Wings open with abdomen  
229 erect’ where females opened their wings displaying the dorsal wing surface with the abdomen  
230 erect. Each of these behaviours was scored as having occurred or not occurred during each of  
231 the one-minute presentations. This led to a dataset for individual females where the proportion  
232 of one-minute presentations in which each behaviour was observed was calculated (for male  
233 extract and control trials separately). To reduce the number of dependent variables we then  
234 performed a principal component analysis on these data. The principal component scores for  
235 each individual were extracted and were used to test for differences in response between  
236 presentations with the male extract and control (solvent only) in paired tests. Statistical  
237 analyses were performed with *R* (version 3.1.2).

238

## 239 **Results**

### 240 *Morphological analysis*

241 In order to investigate structural differences in scale morphology potentially associated with  
242 pheromone production, we observed androconial scales of *H. melpomene rosina* males and  
243 females under the scanning electron microscope (Figure 2). We identified a marked sexual  
244 dimorphism in scale structure. In the central region of the male hindwing androconia along

245 vein Sc+R1 we identified scales with brush-like structures (Figure 2d) at their distal end  
246 (Figure 2a). These scales were completely absent in females and in the forewing androconia  
247 of the males (Figure 2). These scales were also not detected in any other wing region  
248 examined. The brush-like scales were found in alternating rows with scales with a normal  
249 structure. Moving away from the Sc+R1 wing vein, the density and width of these scales  
250 decreased, with isolated brush-like scales found completely surrounded by normal scales. In  
251 addition, it was found that the base of these brush-like scales was more swollen and glandular  
252 as compared to other scales, perhaps indicating a location for the storage or production of the  
253 pheromone (Figure 3).

254

#### 255 *Characterization of potential male sex pheromone*

256 Using gas chromatography linked to mass spectrometry (GC/MS) and synthesis, six potential  
257 male sex pheromone components were found in the male wing extracts from Ecuador samples  
258 (Figure 4). These compounds were, (Z)-9-octadecenal, octadecanal, heneicosane, (Z)-11-  
259 icosenal, icosanal and (Z)-13-docosenal. Out of these six compounds, only heneicosane was  
260 found in all regions of the wing, but (Z)-9-octadecenal, octadecanal, (Z)-11-icosenal, icosanal  
261 and (Z)-13-docosenal were restricted to the androconial scale region of the wing. The  
262 hindwing androconial region tended to contain higher titres of these five compounds as  
263 compared to forewing androconial wing region (Figure 5). Octadecanal was present in higher  
264 amounts in hindwing androconia, while icosanal were only found in trace quantities. (Z)-9-  
265 Octadecenal was found in small amounts only in some of the Ecuador samples. A related  
266 compound, (Z)-11-Icosanol, was found in trace amounts in two Ecuador mature males. Except  
267 for heneicosane, all five compounds were observed to be age-specific and sex-specific.  
268 Heneicosane was present in the hindwing androconia of both 10-day old and newly emerged  
269 males and in females of all ages. In contrast, (Z)-9-octadecenal, octadecanal, (Z)-11-icosenal,  
270 icosanal and (Z)-13-docosenal were only present in extracts from the hindwing androconia of  
271 10-day old males. The chemical analysis of the extracts of the Panama samples showed a  
272 similar composition, although they contained more compounds in slightly higher  
273 concentrations. Major components of both the Panama and Ecuador individuals were  
274 octadecanal, (Z)-11-icosenal, icosanal, and (Z)-13-docosenal. (Z)-11-Icosanol was found in  
275 larger amounts in the Panama samples. They additionally contained high amounts of  
276 octadecanol. Small amounts of nonadecanal, methyl-branched octadecanals and their  
277 respective alcohols occurred as well. Some of them were identified to be 15-, 16-, and 17-  
278 methyloctadecanals and the respective alcohols. These compounds were found only in the  
279 Panama samples with the exception of 17-methyloctadecanal, which was present in two of the  
280 samples from Ecuador. *n*-Alkanes were not present in these extracts.



281

## 282 *Behavioural experiments*

283 We tested ten individual virgin females in our behavioural trials, each of which was presented  
284 sequentially with either male wing extract or a control (solvent only) applied to a paper  
285 model. Behavioural scores were analysed using a principal components analysis, with two  
286 principal components retained that together accounted for 80.38% of the variance in the data  
287 (Table 1, see also supplementary file 1 for the raw data). The second axis accounted for  
288 18.3% of the variance. There was no significant difference between male extract and control  
289 (solvent only) trials for PC1 (Figure 6; Wilcoxon signed rank test:  $V = 33, p > 0.05$ );  
290 however, there was a significant difference between male extract and control (solvent only)  
291 trials for PC2 (Figure 6; Wilcoxon signed rank test:  $V = 49, p < 0.05$ ).

292

## 293 **Discussion**

294 Many previous studies of *Heliconius* butterflies have described a role for visual cues in mate  
295 finding, courtship behaviour, reproductive isolation and speciation (Crane, 1955; Brown, 1981;  
296 Jiggins *et al.*, 2001; Kronforst *et al.*, 2006; Giraldo *et al.*, 2008; Estrada & Jiggins, 2008; Merrill  
297 *et al.*, 2011a). Here, we have identified compounds associated with sexually mature male wings  
298 and described morphological structures putatively involved in pheromone release. Furthermore,  
299 we have shown that wing extracts influence female behaviour.

300 We identified six potential MSP compounds from male wing extracts, namely, (*Z*)-9-  
301 octadecenal, octadecanal, heneicosane, (*Z*)-11-icosenal, icosanal and (*Z*)-13-docosenal. Five of  
302 these are restricted to the androconial region of hindwings of 10-day old males, suggesting a  
303 likely role in courtship. Our results are broadly comparable with another recent analysis of wing  
304 compounds in *Heliconius* (Mérot *et al.*, 2015), although this recent study did not compare  
305 different wing regions, or similarly aged males and females. As the study also did not use  
306 synthesis to identify compounds, our work is highly complementary and extends their results  
307 to confirm localization of compounds to older males. Male *Heliconius* do not become sexually  
308 active until several days after eclosion, so the absence of these compounds from females and  
309 younger males is strongly suggestive of a role in mating behaviours. That these five MSP  
310 compounds are largely restricted to the hindwing androconia of mature males (Figure 5a)  
311 suggests that pheromone storage or production is restricted to the hindwing. Trace amounts on  
312 the forewing androconia may be due to contact in the overlapping portion of the fore- and  
313 hindwings, and both wings may play a role in dispersal of the compounds during courtship. The  
314 wild samples from Panama had both a greater diversity of compounds and higher concentrations  
315 on their wings. Further work will be needed to determine whether this is characteristic of natural

316 populations, or reflects a difference between geographic populations of *H. melpomene*, or is  
317 perhaps simply a result of natural inter-individual variation.

318 Scanning electron microscope images of the androconia support storage and/or  
319 production of MSPs in the hindwing. The androconial region of male hindwings are equipped  
320 with special brush-like scales (Figure 2a), which might facilitate the release of the pheromone  
321 during courtship and are completely absent in females and any other region of male wings.  
322 These were located primarily around and along the hindwing vein Sc+R1, similar to the  
323 depiction in Figure 73 of Emsley's previous morphological analysis (Emsley, 1963). Similar  
324 scales have been described from light microscopy in other *Heliconius* species, but not  
325 previously in *H. melpomene* (Müller, 1912; Barth, 1952). The base of these special brush-like  
326 scales was more swollen and glandular as compared to other scales (Figure 3), perhaps  
327 indicating a role in storage or production of pheromones by these scales. Even though  
328 *Heliconius* do not have the dramatic sexual dimorphism in hair pencils or brush-like androconia  
329 seen in other butterflies, they nonetheless do possess male-specific structures likely associated  
330 with pheromone production.

331 We were able to detect a significant, though subtle, difference in the behavioural  
332 response of females towards models treated with male wing extracts as compared to an  
333 unscented control. This indicates that females both detect compounds found on the male wings,  
334 and alter their behaviour in response to those compounds. This supports our hypothesis that  
335 these compounds act as a pheromone involved in courtship behaviour. Nonetheless, it remains  
336 unclear exactly what the information is that is conveyed by these signals. The signal may  
337 influence female courtship, although it is likely that these compounds convey complex  
338 information about male species identity, quality, age etc. that are interpreted by females in  
339 combination with visual and tactile cues. Recent experiments carried out in Peru also  
340 demonstrate the role of chemical signals in species recognition between *H. melpomene* and *H.*  
341 *timareta*, although these do not distinguish between the role of wing and abdominal pheromone  
342 signals (Mérot *et al.*, 2015). Further experiments are necessary to disentangle the details of  
343 inter-specific signaling during courtship in *Heliconius*. We are also currently unable to  
344 determine which of the compounds identified here are biologically active. Experiments with  
345 synthetic blends of putative MSP compounds were largely inconclusive, so are not presented  
346 here.

347 The use of multiple signals is common in animal communication (Candolin, 2003).  
348 Moths being nocturnal mainly depend upon chemical cues to attract their mates (Ando,  
349 Inomata, & Yamamoto, 2004). On the other hand, butterflies primarily use visual cues to locate  
350 mates (Kemp & Rutowski, 2011). It has been shown in *B. anynana* that in addition to visual  
351 cues, chemical cues also play a role and are equally important in sexual selection by female

352 choice (Costanzo & Monteiro, 2007). Divergent color patterns and extensive mimicry by  
353 different species of *Heliconius* has resulted in the use of multiple signals to maintain species  
354 specificity. Two sympatric cryptic species that share a wing pattern, *H. melpomene malleti* and  
355 *H. timareta florencia*, nonetheless show strong assortative mating. This suggests that enhanced  
356 divergence in pheromonal signals acts as an important cue in reproductive isolation in these  
357 species (Giraldo *et al.*, 2008). Exploring the pheromonal signals and morphological structures  
358 involved in the process in *H. melpomene* is our first step towards understanding multimodal  
359 signaling and its role in reproductive isolation.

360

### 361 **Acknowledgments**

362 SJ is funded by a Manmohan Singh studentship from St John's College. RMM is funded by a  
363 Junior Research Fellowship at King's College, Cambridge. CDJ and RMM are supported by a  
364 European Research Council grant number 339873 SpeciationGenetics. We acknowledge the  
365 support of Caroline Nieberding and Christer Löfstedt who provided early encouragement to  
366 pursue this project.

367

### 368 **References**

369 **Ando T, Inomata S ichi, Yamamoto M. 2004.** Lepidopteran Sex Pheromones. In: Schulz  
370 S, ed. Topics in Current Chemistry. The Chemistry of Pheromones and Other  
371 Semiochemicals I. Springer Berlin Heidelberg, 51–96.

372 **Bacquet PMB, Brattström O, Wang HL, Allen CE, Löfstedt C, Brakefield PM,**  
373 **Nieberding CM. 2015.** Selection on male sex pheromone composition contributes to  
374 butterfly reproductive isolation. *Proceedings. Biological Sciences / The Royal Society* **282**:  
375 20142734.

376 **Barth R. 1952.** Os órgãos odoríferos masculinos de alguns Heliconiinae do Brasil.  
377 *Memórias do Instituto Oswaldo Cruz* **50**: 355–367.

378 **Bates HW. 1862.** Contributions to an insect fauna of the Amazon valley. Lepidoptera:  
379 Heliconidae. *Transactions of the Linnean Society of London* **23**: 495–566.

380 **Becker HG, Beckert R. 1993.** *Organikum-Organisch-Chemisches Praktikum*. Wiley-VCH  
381 Weinheim.

382 **Brower LP, Jones MA. 1965.** Precourtship interaction of wing and abdominal sex  
383 glands in male Danaus butterflies. *Proceedings of the Royal Entomological Society of*  
384 *London. Series A, General Entomology* **40**: 147–151.

385 **Brown KS. 1981.** The Biology of *Heliconius* and Related Genera. *Annual Review of*  
386 *Entomology* **26**: 427–456.

387 **Buser HR, Arn H, Guerin P, Rauscher S. 1983.** Determination of double bond position  
388 in mono-unsaturated acetates by mass spectrometry of dimethyl disulfide adducts.  
389 *Analytical Chemistry* **55**: 818–822.

- 390 **Candolin U. 2003.** The use of multiple cues in mate choice. *Biological Reviews* **78**: 575–  
391 595.
- 392 **Costanzo K, Monteiro A. 2007.** The use of chemical and visual cues in female choice in  
393 the butterfly *Bicyclus anynana*. *Proceedings of the Royal Society of London B: Biological*  
394 *Sciences* **274**: 845–851.
- 395 **Crane J. 1955.** Imaginal behaviour of a Trinidad butterfly, *Heliconius erato hydara*  
396 Hewitson, with special reference to the social use of color. *Zoologica, New York* **40**: 167–  
397 196.
- 398 **Emsley MG. 1963.** A morphological study of imagine Heliconiinae (Lep., Nymphalidae)  
399 with a consideration of the evolutionary relationships within the group. *Zoologica, New*  
400 *York* **48**: 85–130.
- 401 **Estrada C, Yildizhan S, Schulz S, Gilbert LE. 2010.** Sex-specific chemical cues from  
402 immatures facilitate the evolution of mate guarding in *Heliconius* butterflies. *Proceedings*  
403 *of The Royal Society. Biological Sciences* **277**: 407–413.
- 404 **Estrada C, Gilbert LE. 2010.** Host plants and immatures as mate-searching cues in  
405 *Heliconius* butterflies. *Animal Behaviour* **80**: 231–239.
- 406 **Estrada C, Jiggins CD. 2008.** Interspecific sexual attraction because of convergence in  
407 warning colouration: is there a conflict between natural and sexual selection in mimetic  
408 species? *Journal of Evolutionary Biology* **21**: 749–60.
- 409 **Finkbeiner SD, Briscoe AD, Reed RD. 2014.** Warning signals are seductive: Relative  
410 contributions of color and pattern to predator avoidance and mate attraction in  
411 *Heliconius* butterflies. *Evolution* **68**: 3410–3420.
- 412 **Gilbert LE. 1976.** Postmating female odor in *Heliconius* butterflies: a male-contributed  
413 antiaphrodisiac? *Science* **193**: 419–420.
- 414 **Giraldo N, Salazar C, Jiggins CD, Bermingham E, Linares M. 2008.** Two sisters in the  
415 same dress: *Heliconius* cryptic species. *BMC Evolutionary Biology* **8**: 324.
- 416 **Grillet M, Dartevelle L, Ferveur JF. 2006.** A *Drosophila* male pheromone affects female  
417 sexual receptivity. *Proceedings of the Royal Society of London B: Biological Sciences* **273**:  
418 315–323.
- 419 **Gruha JW, McChesney JD, Taylor OR. 1980.** Aphrodisiac pheromones of the sulfur  
420 butterflies *Colias eurytheme* and *C. philodice* (Lepidoptera, Pieridae). *Journal of Chemical*  
421 *Ecology* **6**: 241–256.
- 422 **Jiggins CD, Naisbit RE, Coe RL, Mallet J. 2001.** Reproductive isolation caused by colour  
423 pattern mimicry. *Nature* **411**: 302–305.
- 424 **Jiggins CD. 2008.** Ecological Speciation in Mimetic Butterflies. *BioScience* **58**: 541–548.
- 425 **Jiggins CD, Estrada C, Rodrigues A. 2004.** Mimicry and the evolution of premating  
426 isolation in *Heliconius melpomene* Linnaeus. *Journal of Evolutionary Biology* **17**: 680–  
427 691.
- 428 **Kemp DJ, Rutowski RL. 2011.** The Role of Coloration in Mate Choice and Sexual  
429 Interactions in Butterflies. *Advances in the Study of Behavior*. Elsevier, 55–92.

- 430 **Kronforst MR, Young LG, Kapan DD, McNeely C, O'Neill RJ, Gilbert LE. 2006.** Linkage  
431 of butterfly mate preference and wing color preference cue at the genomic location of  
432 wingless. *Proceedings of the National Academy of Sciences of the United States of America*  
433 **103**: 6575–6580.
- 434 **Lassance JM, Groot AT, Liénard MA, Antony B, Borgwardt C, Andersson F,**  
435 **Hedenström E, Heckel DG, Löfstedt C. 2010.** Allelic variation in a fatty-acyl reductase  
436 gene causes divergence in moth sex pheromones. *Nature* **466**: 486–489.
- 437 **Löfstedt C. 1993.** Moth Pheromone Genetics and Evolution. *Philosophical Transactions*  
438 *of the Royal Society of London B: Biological Sciences* **340**: 167–177.
- 439 **Meinwald J, Meinwald YC, Mazzocchi PH. 1969.** Sex Pheromone of the Queen  
440 Butterfly: Chemistry. *Science* **164**: 1174–1175.
- 441 **Melo MC, Salazar C, Jiggins CD, Linares M. 2009.** Assortative mating preferences  
442 among hybrids offers a route to hybrid speciation. *Evolution* **63**: 1660–1665.
- 443 **Mérot C, Frérot B, Leppik E, Joron M. 2015.** Beyond magic traits: Multimodal mating  
444 cues in *Heliconius* butterflies. *Evolution: n/a–n/a*.
- 445 **Merrill RM, Gompert Z, Dembeck LM, Kronforst MR, McMillan WO, Jiggins CD.**  
446 **2011a.** Mate preference across the speciation continuum in a clade of mimetic  
447 butterflies. *Evolution* **65**: 1489–1500.
- 448 **Merrill RM, Van Schooten B, Scott JA, Jiggins CD. 2011b.** Pervasive genetic  
449 associations between traits causing reproductive isolation in *Heliconius* butterflies.  
450 *Proceedings of The Royal Society. Biological Sciences* **278**: 511–518.
- 451 **Merrill RM, Dasmahapatra KK, Davey JW, Dell'Aglio DD, Hanly JJ, Huber B, Jiggins**  
452 **CD, Joron M, Kozak KM, Llaurens V, et al. 2015.** The diversification of *Heliconius*  
453 butterflies: what have we learned in 150 years? *Journal of Evolutionary Biology* **28**:  
454 1417–1438.
- 455 **Merrill RM, Chia A, Nadeau NJ. 2014.** Divergent warning patterns contribute to  
456 assortative mating between incipient *Heliconius* species. *Ecology and Evolution* **4**: 911–  
457 917.
- 458 **More JD, Finney NS. 2002.** A Simple and Advantageous Protocol for the Oxidation of  
459 Alcohols with o-Iodoxybenzoic Acid (IBX). *Organic Letters* **4**: 3001–3003.
- 460 **Müller F. 1912.** X. The Scent-scales of the Male 'Maracujá butterflies'. In: Longstaff GB,  
461 ed. *Butterfly Hunting in Many Lands*. New York: Longmans, Green & Co., 655–659.
- 462 **Naisbit RE, Jiggins CD, Mallet J. 2001.** Disruptive sexual selection against hybrids  
463 contributes to speciation between *Heliconius cydno* and *Heliconius melpomene*.  
464 *Proceedings of the Royal Society of London Series B-Biological Sciences* **268**: 1849–1854.
- 465 **Nieberding CM, de Vos H, Schneider MV, Lassance JM, Estramil N, Andersson J,**  
466 **Bång J, Hedenström E, Löfstedt C, Brakefield PM. 2008.** The Male Sex Pheromone of  
467 the Butterfly *Bicyclus anynana*: Towards an Evolutionary Analysis. *PLoS ONE* **3**: e2751.
- 468 **Nieberding CM, Fischer K, Saastamoinen M, Allen CE, Wallin EA, Hedenström E,**  
469 **Brakefield PM. 2012.** Cracking the olfactory code of a butterfly: the scent of ageing.  
470 *Ecology Letters* **15**: 415–424.



- 471 **Nishida R, Schulz S, Kim CS, Fukami H, Kuwahara Y, Honda K, Hayashi N. 1996.**  
472 Male sex pheromone of a giant danaine butterfly, *Idea leuconoe*. *Journal of Chemical*  
473 *Ecology* **22**: 949–972.
- 474 **Phelan PL, Baker TC. 1987.** Evolution of male pheromones in moths: reproductive  
475 isolation through sexual selection? *Science (New York, N.Y.)* **235**: 205–207.
- 476 **Pliske TE, Eisner T. 1969.** Sex Pheromone of the Queen Butterfly: Biology. *Science* **164**:  
477 1170–1172.
- 478 **Schulz S, Estrada C, Yildizhan S, Boppré M, Gilbert LE. 2008.** An Antiaphrodisiac in  
479 *Heliconius melpomene* Butterflies. *Journal of Chemical Ecology* **34**: 82–93.
- 480 **Smadja C, Butlin RK. 2008.** On the scent of speciation: the chemosensory system and  
481 its role in premating isolation. *Heredity* **102**: 77–97.
- 482 **Symonds MRE, Johnson TL, Elgar MA. 2012.** Pheromone production, male abundance,  
483 body size, and the evolution of elaborate antennae in moths. *Ecology and Evolution* **2**:  
484 227–246.
- 485 **Wyatt TD. 2003.** *Pheromones and Animal Behaviour: Communication by Smell and Taste*.  
486 Cambridge University Press.
- 487 **Wyatt TD. 2014.** *Pheromones and Animal Behavior: Chemical Signals And Signatures*.  
488 Cambridge: Cambridge University Press.
- 489 **Yildizhan S, van Loon J, Sramkova A, Ayasse M, Arsene C, ten Broeke C, Schulz S.**  
490 **2009.** Aphrodisiac Pheromones from the Wings of the Small Cabbage White and Large  
491 Cabbage White Butterflies, *Pieris rapae* and *Pieris brassicae*. *ChemBioChem* **10**: 1666–  
492 1677.
- 493



494 Figure 1. A) *H. melpomene malleti* male (left) and *H. melpomene plesseni* female (right). B)  
495 Dissected wings from specimens of *H. melpomene plesseni* showing sexual dimorphism in the  
496 androconial region, with male (left) and female (right). C) Expanded view of the androconial  
497 region with arrow highlighting the vein Sc+R1. The pale grey-brown region in the male wing  
498 was dissected for chemical analysis.

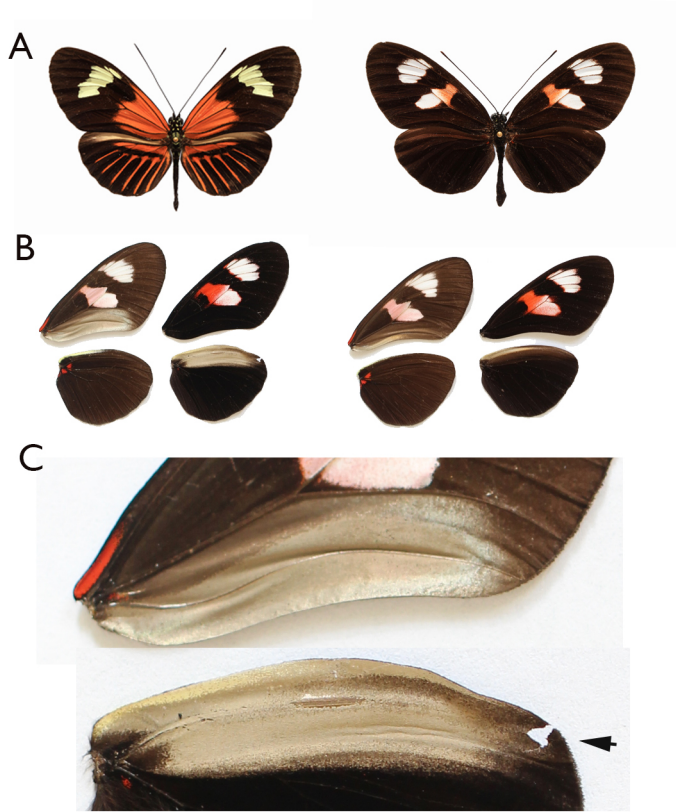

499  
500

501 Figure 2: SEM image of putative androconial scales of *H. melpomene*. Scales in the region of  
502 the hindwing vein Sc+R1 and forewing vein 1A are shown. (A) male hindwing (B) male  
503 forewing and (C) female forewing at 500x magnification. (D) Magnified view of brush-like  
504 structures of the special scales. Scale bars indicate 50  $\mu\text{m}$  (A-C) and 2  $\mu\text{m}$  (D).

505 =

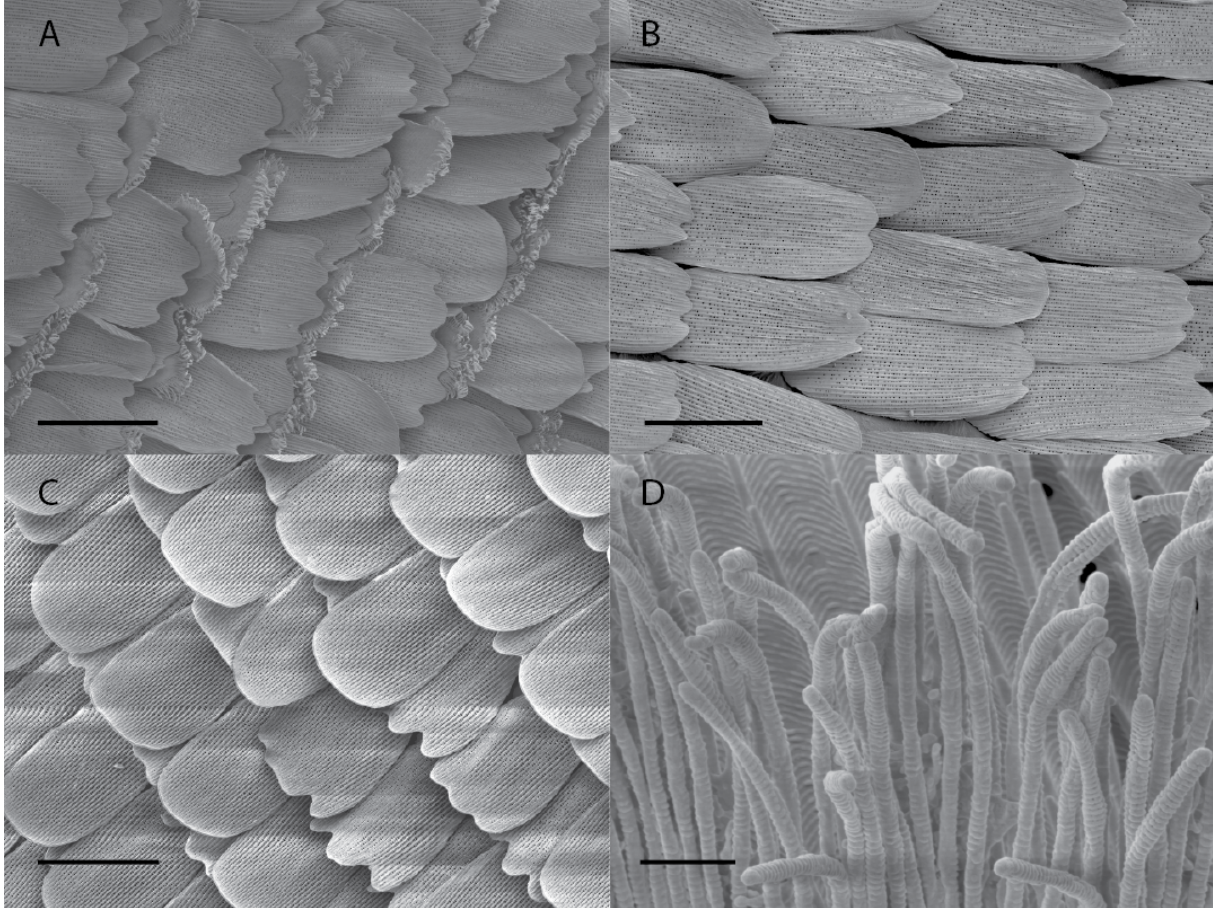

506

507

508 Figure 3: SEM image of the base of a scale of hindwing androconia of *H. melpomene* (A)  
509 scale from androconial region of male with brush-like structures. (B) scale from androconial  
510 region of female. Scale bars indicate 10  $\mu\text{m}$ .

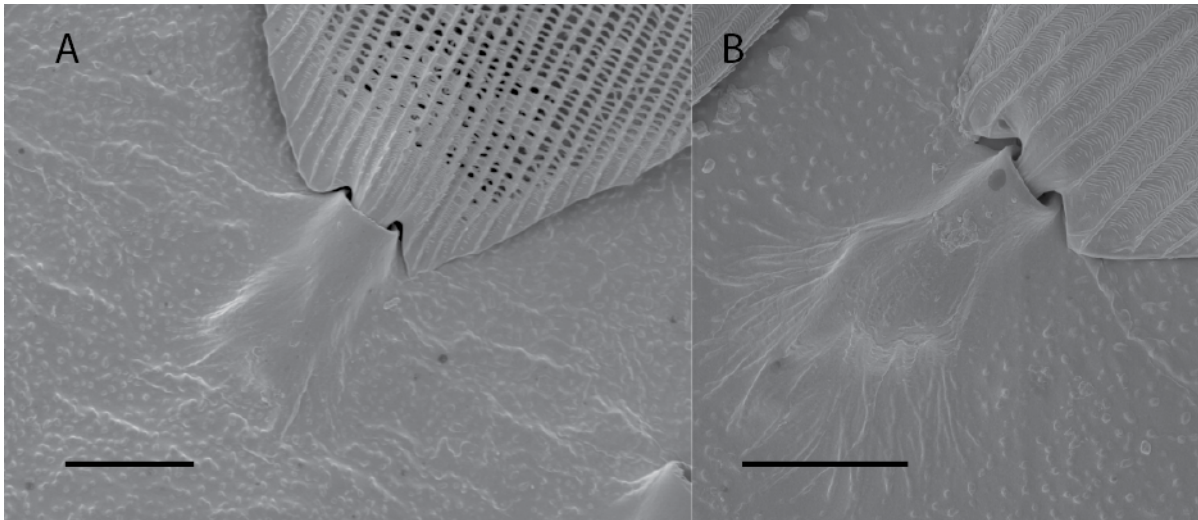

511  
512

513 Figure 4: Total ion chromatograms of extracts from the androconial region of an  
514 Ecuadorian *H. melpomene* and a Panamanian *H. melpomene* male hindwing. 1: (*Z*)-9-  
515 octadecenal; 2: octadecanal; 3: 15-, 16-, 17-methyloctadecanals, and additional  
516 methyloctadecanal; 4: 1-octadecanol; 5: heneicosane; 6: 15-, 16-, and 17-  
517 methyloctadecan-1-ols, additional methyloctadecanol, and nonadecanal; 7: (*Z*)-11-  
518 icosenal; 8: icosanal; 9: (*Z*)-11-icosenol; 10: tricosane; 11: (*Z*)-13-docosenal. All peaks  
519 eluting later than 44 min are cuticular compounds consisting of larger *n*-alkanes, 2,5-  
520 dialkyltetrahydrofurans, cholesterol or are contaminations.  
521

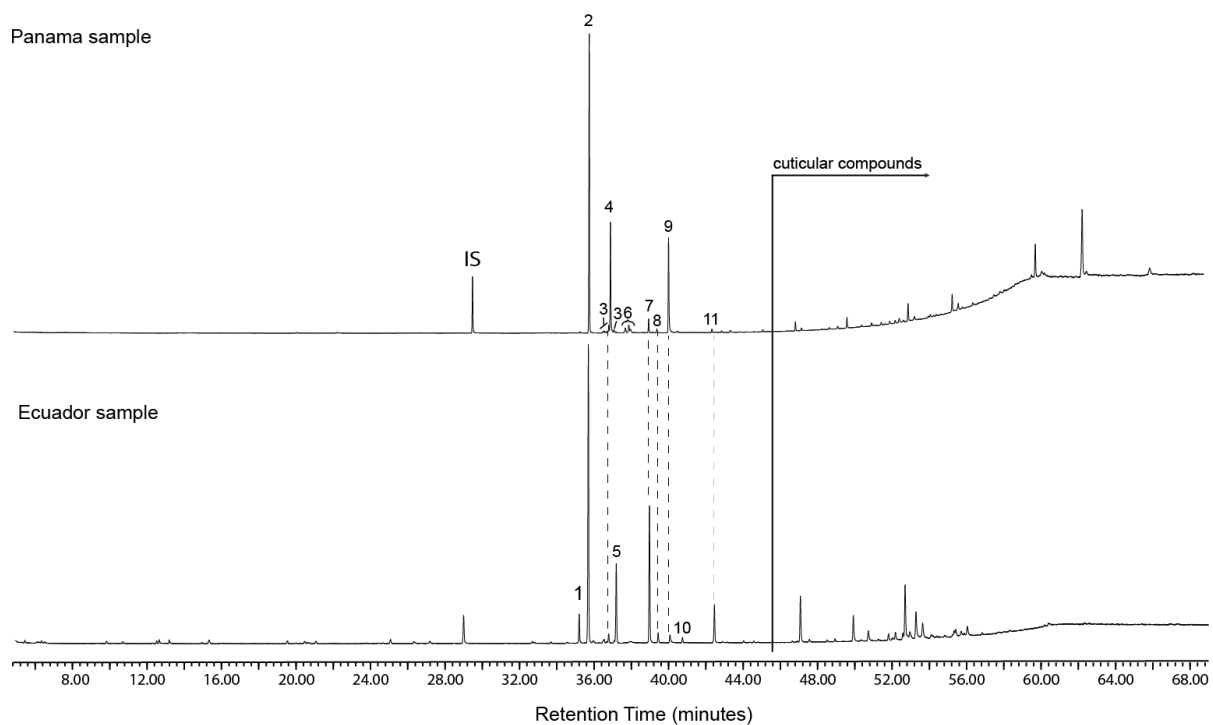

522

523

524

525 Figure 5: GC/MS analyses of *H. melpomene* wing extracts showing presence of putative male  
526 sex pheromone compounds (a) Presence of compounds in the hindwing androconial region of  
527 five mature females, five young and five mature males, showing that compounds are largely  
528 restricted to mature males. (b) Presence of compounds in five mature females, five young and  
529 five mature males, showing that compounds are largely restricted to mature males. (c)  
530 Presence of compounds in hindwing androconial region of five wild males from Panama.

A

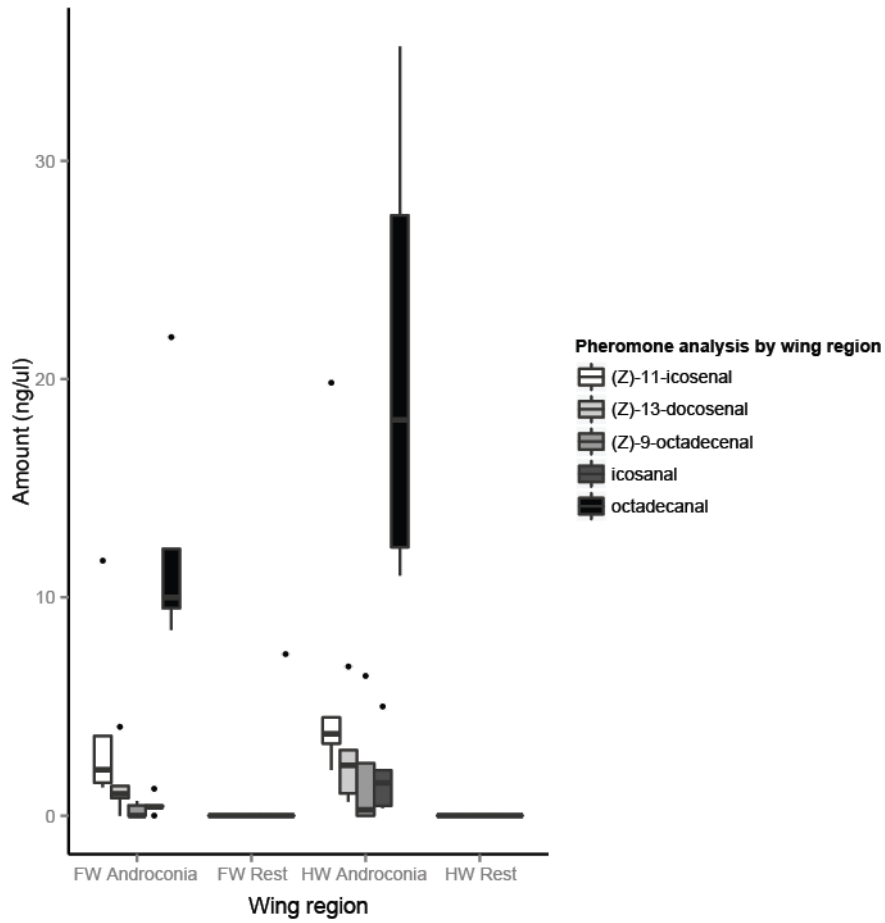

B

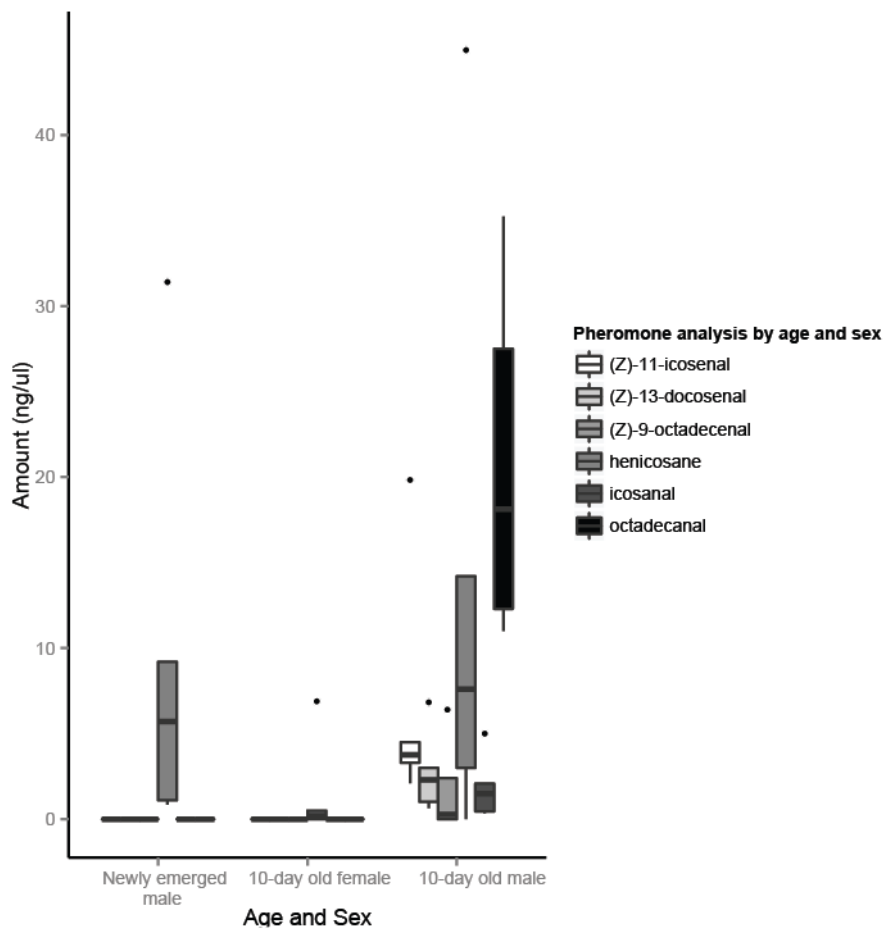



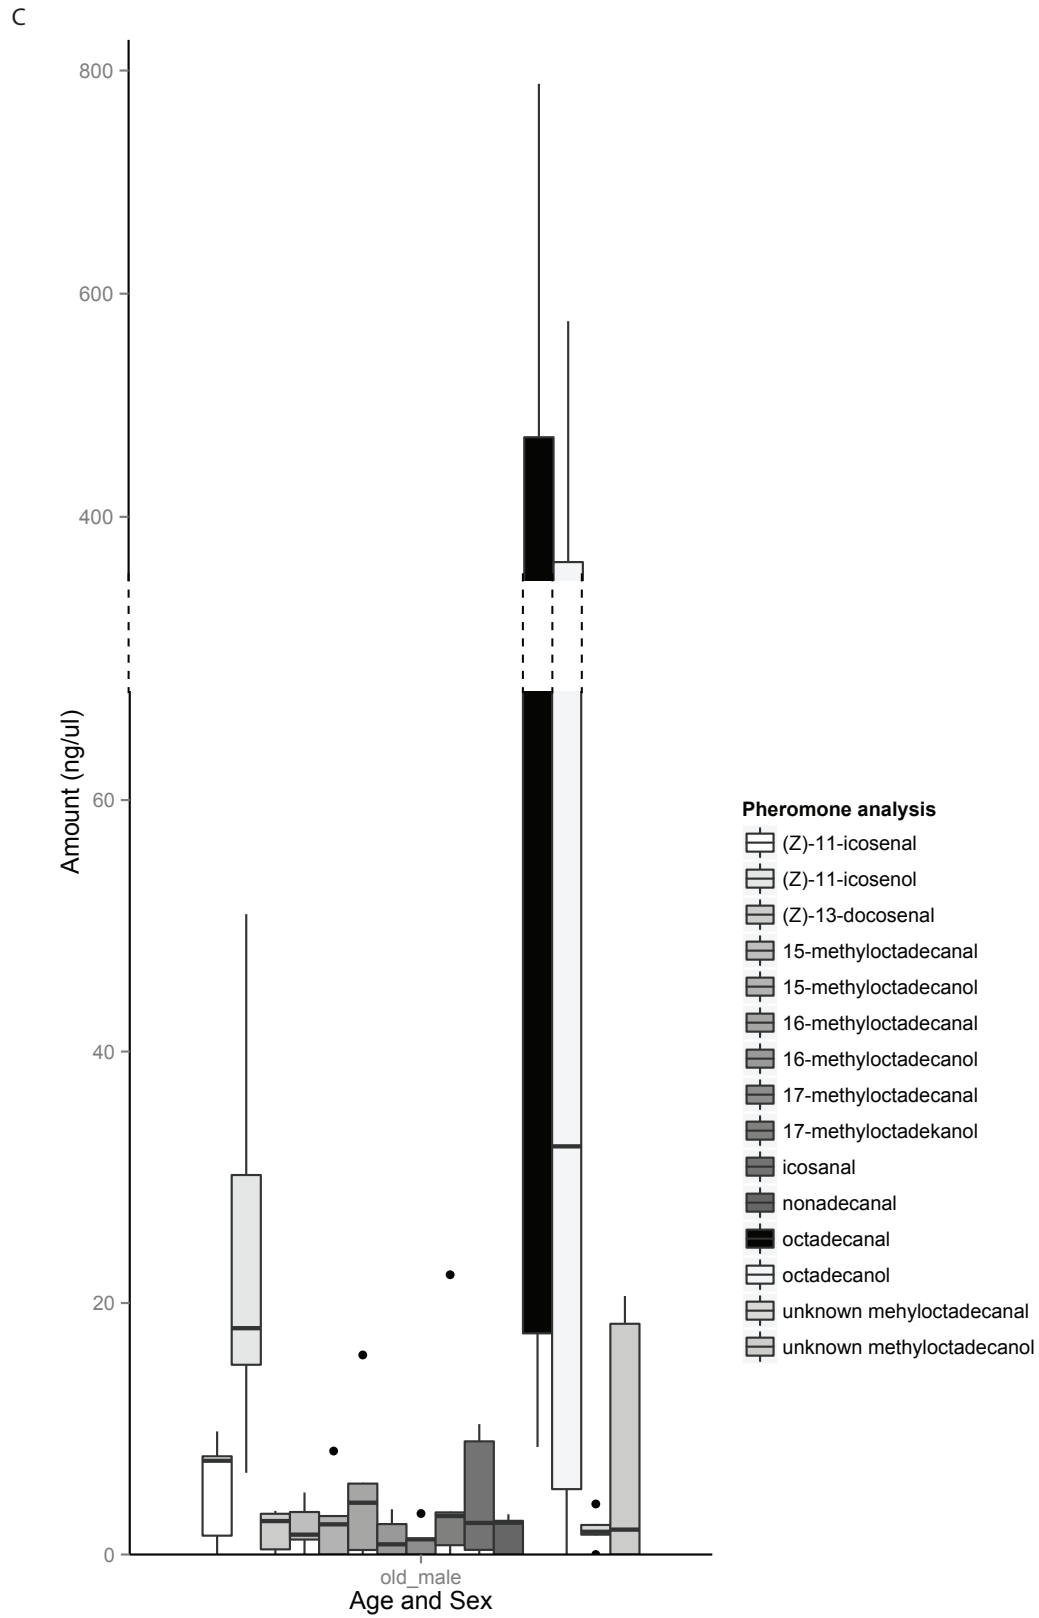

533

534

535 Figure 6: Differences in behavioural response for *H. melpomene* females presented with  
536 models scented with male androconial extracts and unscented controls. Loading scores for  
537 principal components are given in Table 1.

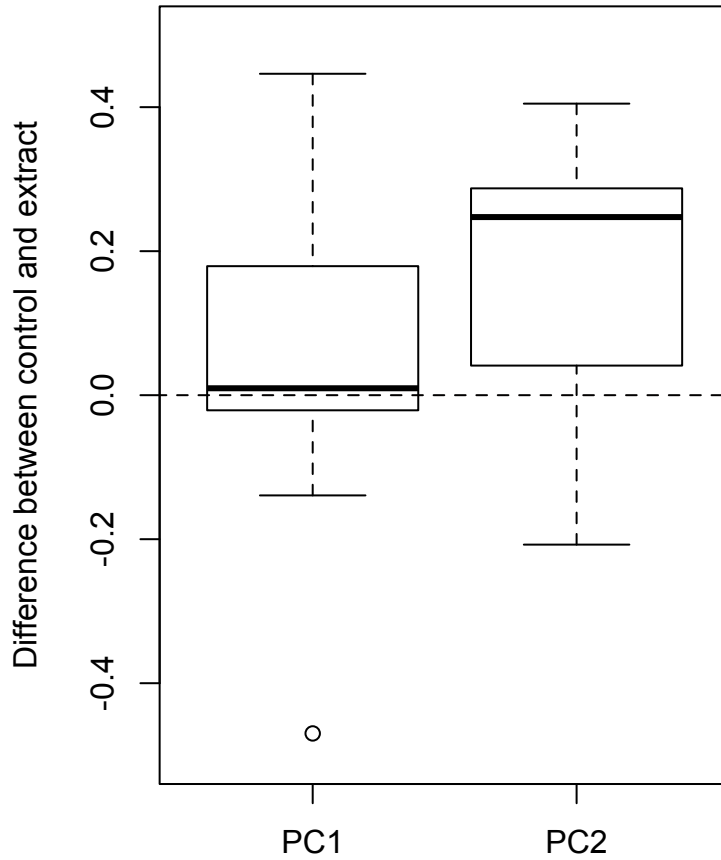

538

539

540 Table 1: Behavioural events scored for females presented with model butterflies and loading  
541 scores for *H. melpomene* female response to differential treatments. The mean proportion of  
542 trials in which a given behavior was observed is shown for both Control and Extract models.  
543 The full data set is given as a supplementary file.

544

| Observed behaviour                 | PC1   | PC2   | Ctrl | Extract |
|------------------------------------|-------|-------|------|---------|
| Slow and moderate wing flapping    | 0.15  | -0.08 | 0.92 | 0.87    |
| Flying/Flying facing towards model | -0.62 | -0.12 | 0.45 | 0.41    |
| Slow rhythmic flight               | -0.41 | -0.26 | 0.23 | 0.31    |
| Wing display with abdomen normal   | 0.25  | -0.63 | 0.09 | 0.15    |
| Quick and jerky wing flapping      | 0.60  | 0.11  | 0.60 | 0.53    |
| Flying away from model             | -0.05 | 0.11  | 0.98 | 0.96    |
| Fast erratic flight                | -0.09 | 0.70  | 0.35 | 0.19    |
| Wings open with abdomen erect      | -0.03 | 0.09  | 0.04 | 0.04    |

545
